# The American Journal of Psychiatry

## A. Paradigm Workflow

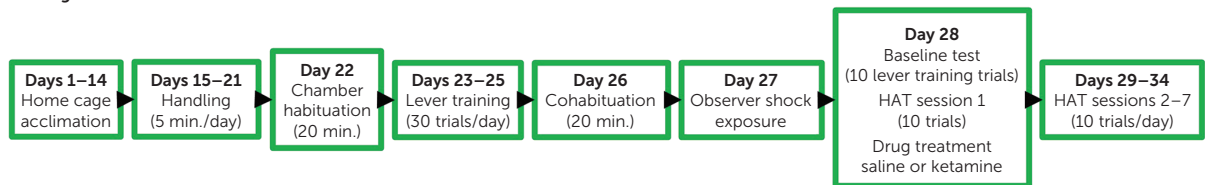

## B. Failed HAT Trial

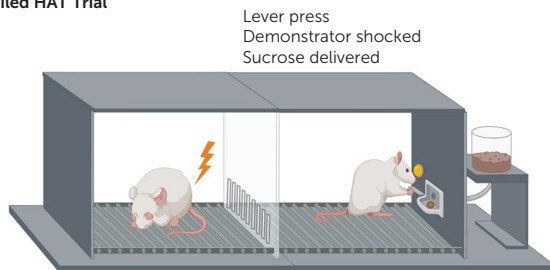

## C. Successful HAT Trial

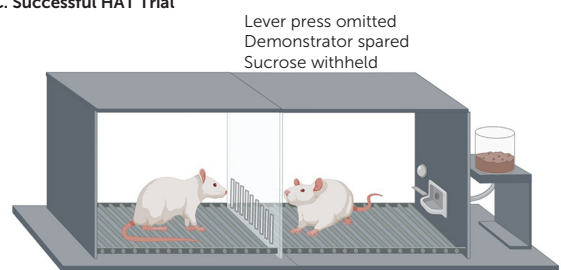

Entactogen Effects of Ketamine: A Reverse-Translational Study

rTMS as a Next Step in Antidepressant Nonresponders

Peer Social Genetic Effects and the Etiology of Substance Use Disorders, Major Depression, and Anxiety Disorder

Association Between Intrauterine System Hormone Dosage and Depression Risk
